# Supplementary material
Source: Springer Nature journal article supplement (https://www.springermedizin.de/resource/supplementary/12890_2014_523_MOESM4_ESM.pdf/9505680)
Supplement: MOESM4 [file 9505680]

| Table 3: Psychometric properties of the newly adapted Stigma scale |                                                  |            |         |
|--------------------------------------------------------------------|--------------------------------------------------|------------|---------|
| Validity                                                           | Correlations                                     |            |         |
| CES-D ( <i>n, r, p-value</i> )                                     | <i>n</i> = 44, <i>r</i> = 0.529, <i>p</i> < .001 |            |         |
| GAD-7 ( <i>n, r, p-value</i> )                                     | <i>n</i> = 39, <i>r</i> = 0.371, <i>p</i> = .014 |            |         |
| CF symptom ( <i>n, r, p-value</i> )                                | <i>n</i> = 44, <i>r</i> = 0.479, <i>p</i> = .001 |            |         |
| SF- 12 ( <i>n, r, p-value</i> )                                    | <i>n</i> = 44, <i>r</i> = -.454, <i>p</i> = .002 |            |         |
| CF-specific QOL ( <i>n, r, p-value</i> )                           | <i>n</i> = 39, <i>r</i> = -.645, <i>p</i> < .001 |            |         |
| Reliability                                                        |                                                  |            |         |
| Internal consistency ( $\alpha$ )                                  | 0.79                                             |            |         |
| Mean Inter-item correlation (mean, N)                              | 0.30 (44)                                        |            |         |
| Three month test-retest ( <i>r, p-value</i> )                      | <i>r</i> =0.078; <i>p</i> <.001                  |            |         |
|                                                                    | Baseline                                         | Follow-up  | p-value |
| Mean differences between response items (mean, SD)                 | 16.6 (4.5)                                       | 16.9 (5.1) | 0.3     |

Center for Epidemiologic Study-Depression scale (CES-D)

Cystic Fibrosis symptom scale (CF symptom)

General Anxiety Disorder -7 scale (GAD-7)

Short Form (SF)-12

Cystic Fibrosis-specific Quality of Life (CF-specific QOL)
